# Supplementary material for: Circulating metabolites in progression to islet autoimmunity and type 1 diabetes
Source: PubMed Central journal article supplement (PMC6861356; doi:10.1007/s00125-019-04980-0), 2019-08-23
Supplement: 125_2019_4980_MOESM1_ESM.pdf [file 125_2019_4980_MOESM1_ESM.pdf]

# Circulating Metabolites in Progression to Islet Autoimmunity and Type 1 Diabetes

Electronic supplementary material

## ESM Methods

Two step derivatization:

In the first step 25  $\mu$ l of methoxyamine hydrochloride (TS-45950; Thermo Scientific: USA) was added to the sample. While mixing, the solution was incubated for one hour at 45 °C. In the second step, 25  $\mu$ l of N-methyl-N-trimethylsilyltrifluoroacetamide (Sigma-Aldrich; Steinheim, Germany) was added. Incubation was again performed for one hour at 45 °C. Before injection 50  $\mu$ l of hexane was added to increase the volatility of the solvent. Additional standards here added during derivatization. n-alkanes (c = 8 mg/l in MSTFA) were used for calculation of retention indexes and 4,4'-dibromooctafluorobiphenyl (c = 9.8 mg/l in hexane) were used as syringe standard to control the quality of injection. 1  $\mu$ l of derivatized sample was injected after derivatization program was completed.

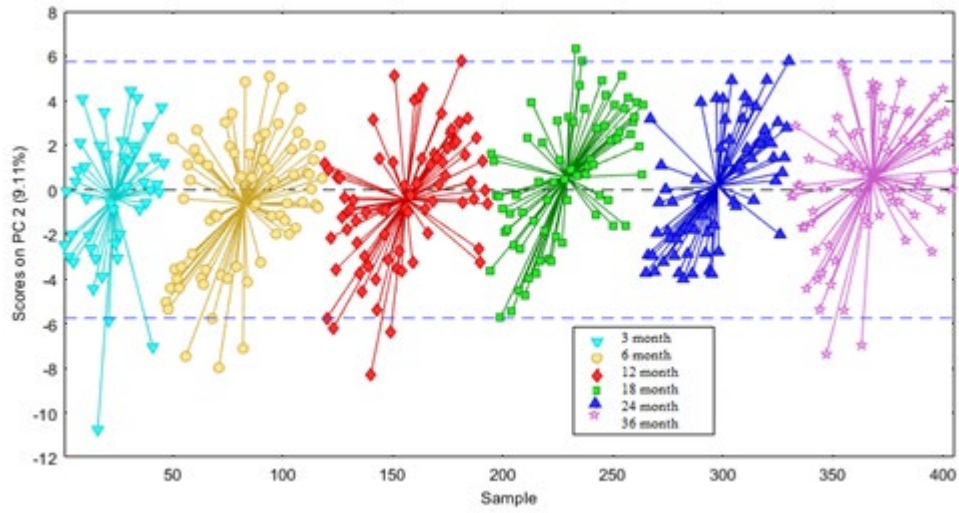

**ESM Figure 1.** PCA score plot of the second principal component obtained from 405 plasma samples.

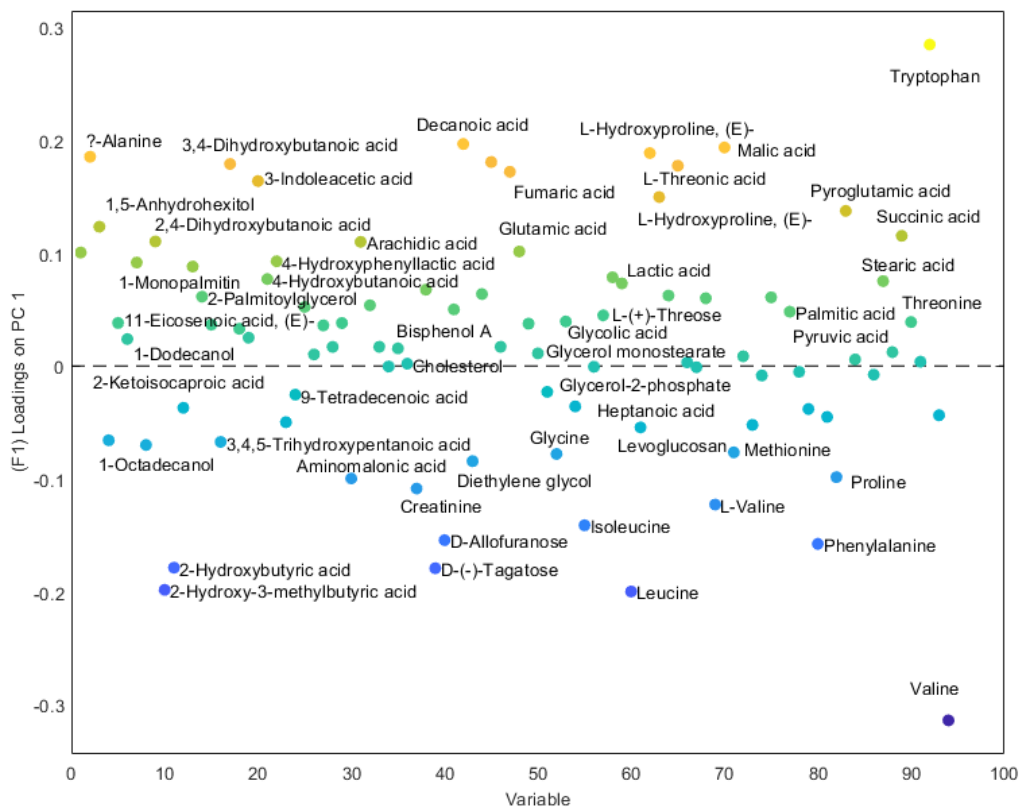

**ESM Figure 2.** ASCA PC<sub>1</sub> loading plot for Fig 1. The loading explains the pattern seen in the score plot that provides the means to interpret the class specific metabolic alteration related to age. x-axis is the variable order and y-axis represents the metabolic pattern corresponding to the score plot. Here, colour of the loadings indicates the loading scores in PC<sub>1</sub>.

**a**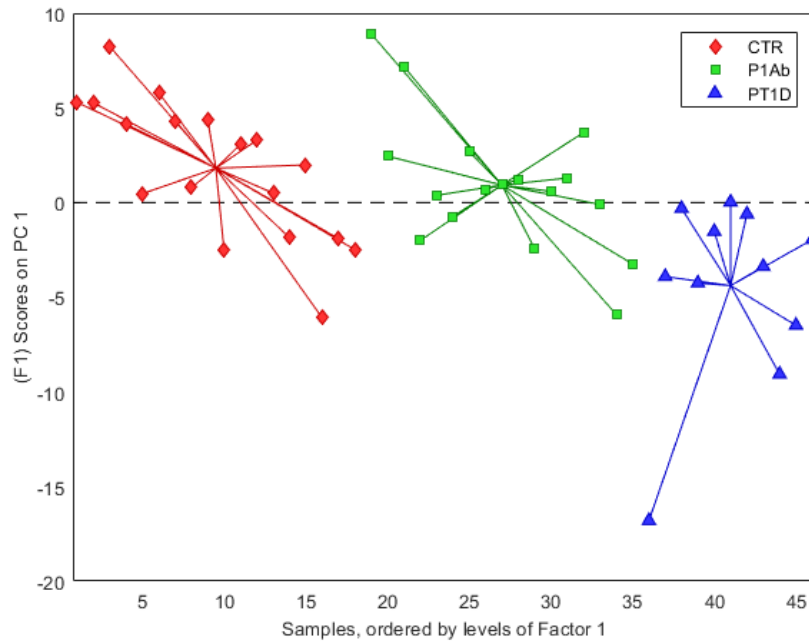**b**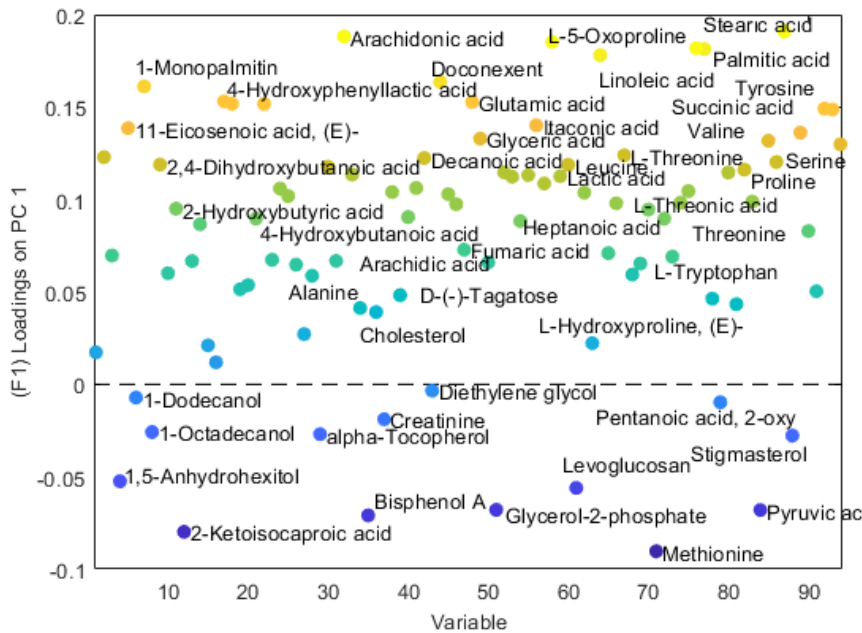

**ESM Figure 3.** PCA score plots and loadings based on ANOVA-simultaneous component analysis (ASCA). **(a)** PC<sub>1</sub> score plot obtained based on the factor study cases score in ASCA analysis at age of 3 months. Here, each sample is represented by a point and coloured according to the case (red diamond: subjects who remained islet autoantibody negative during the follow-up age (CTR), green square: subjects who tested positive for at least one antibody in a minimum of two consecutive samples but did not progress to clinical T1D during the follow-up (P1Ab), blue triangle up: progressors to type-1-diabetes (PT1D)). Samples with similar score are clustered together. **(b)** The corresponding PC<sub>1</sub> loading plot. The loadings explain the pattern seen in the score plot which provides the means to interpret the metabolic alteration related to case. X-axis is the variable order and y-axis represents the metabolic pattern corresponding to the score plot. Here, colour of the loadings indicates the loading scores in PC<sub>1</sub>.

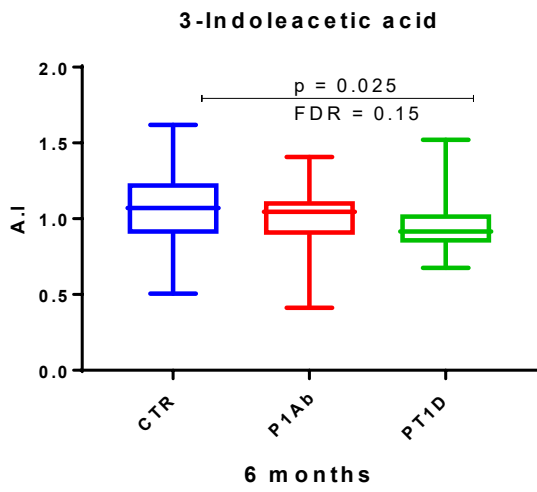

**ESM Figure 4.** Concentrations of 3-Indole acetic acid at 6 months of age.

**ESM Table 1.** Anthropometric characteristics of study population.

|                                                                                        | <b>PT1D</b> | <b>P1Ab</b> | <b>CTR</b> |
|----------------------------------------------------------------------------------------|-------------|-------------|------------|
| <b>Sex(female, male)</b>                                                               | (14, 26)    | (14, 26)    | (14, 26)   |
| <b>Age at time of diagnosis<br/>(mean ± SD)</b>                                        | 4.75 ± 2.94 | NA          | NA         |
| <b>Age at time of first seroconversion<br/>(mean ± SD)</b>                             | 1.34 ± 0.58 | 3.05± 2.50  | NA         |
| <b>HLA information</b>                                                                 |             |             |            |
| <b>High risk (DR3 - DQA1*05 - DQB1*02)<br/>/DRB1*0401/2/4/5 - DQA1*03 - DQB1*0302)</b> | 9           | 4           | 7          |
| <b>Moderately increased risk*</b>                                                      | 21          | 22          | 14         |
| <b>Slightly increased risk*</b>                                                        | 10          | 9           | 7          |
| <b>Neutral*</b>                                                                        |             | 3           | 4          |
| <b>Decreased risk and/or not possible to form<br/>haplotype*</b>                       |             | 2           | 8          |

\*other than DR3 - DQA1\*05 - DQB1\*02) /DRB1\*0401/2/4/5 - DQA1\*03 - DQB1\*0302. This table has been adapted from [10]

ESM Table 2. Coefficient of variation across the analysis (415 samples).

| Metabolite                  | % Coefficient of variation ( CV ) |
|-----------------------------|-----------------------------------|
| Nonadecanoic acid           | 32.61                             |
| Diethylene glycol           | 32.7                              |
| Myo-Inositolphosphate       | 34.86                             |
| Fumaric acid                | 37.55                             |
| 2-Phenylisopropanol         | 39.87                             |
| Valine                      | 41.32                             |
| p-Hydroxydiisopropylbenzene | 41.49                             |
| L-5-Oxoproline              | 43.44                             |
| á-D-(+)-Mannopyranose       | 44.42                             |
| Cholesterol                 | 44.52                             |
| Serine                      | 44.64                             |
| Aminomalonic acid           | 45.53                             |
| Lactic acid                 | 45.69                             |
| Alanine                     | 46.6                              |
| 2-Palmitoylglycerol         | 46.89                             |
| Methylmaleic acid           | 47.02                             |
| 3,4-Dihydroxybutanoic acid  | 47.68                             |
| Glycerol-2-phosphate        | 47.95                             |
| Itaconic acid               | 48.22                             |
| á-D-Glucopyranose           | 48.31                             |
| Octanoic acid               | 49.4                              |
| Threonine                   | 49.93                             |
| Malic acid                  | 50.06                             |
| Stearic acid                | 50.63                             |
| L-Threonic acid             | 50.88                             |
| Palmitic acid               | 51.35                             |
| Isoleucine                  | 52.58                             |
| 1-Dodecanol                 | 53.48                             |
| 4-Hydroxyphenyllactic acid  | 53.51                             |
| Linoleic acid               | 53.82                             |
| 2-Hydroxybutyric acid       | 53.89                             |
| Leucine                     | 54.34                             |
| Arachidic acid              | 54.44                             |
| Arachidonic acid            | 54.51                             |
| L-Threonine                 | 54.52                             |
| 4-Hydroxybutanoic acid      | 55.59                             |
| Pentadecanoic acid          | 56.62                             |
| Stigmasterol                | 57.5                              |
| Doconexent                  | 58.25                             |
| Creatinine                  | 59.25                             |
| 1-Monopalmitin              | 59.73                             |
| Succinic acid               | 59.97                             |



|                                    |        |
|------------------------------------|--------|
| Phenylalanine                      | 60.71  |
| Proline                            | 61.17  |
| 9-Hexadecenoic acid                | 61.55  |
| Oleic acid                         | 61.65  |
| (R*,R*)-2,3-Dihydroxybutanoic acid | 61.81  |
| 9-Tetradecenoic acid               | 61.84  |
| Aconitic acid, (Z)-                | 63.7   |
| Pentanoic acid, 2-oxy              | 64.1   |
| L-Threonic acid                    | 64.54  |
| L-Valine                           | 64.73  |
| Decanoic acid                      | 64.79  |
| D-Allofuranose                     | 64.9   |
| Glycine                            | 65.03  |
| Triethylene glycol                 | 65.28  |
| Pyroglutamic acid                  | 66.76  |
| 1-Octadecanol                      | 67.35  |
| Heptanoic acid                     | 69.93  |
| 2-Ketoisocaproic acid              | 71.48  |
| D-(-)-Lyxofuranose                 | 72.28  |
| Glycerol monostearate              | 72.45  |
| 11-Eicosenoic acid, (E)-           | 72.57  |
| L-Hydroxyproline, (E)-             | 73.85  |
| L-Hydroxyproline, (E)-             | 74.66  |
| 3-Indoleacetic acid                | 74.9   |
| Tyrosine                           | 75.16  |
| 2,4-Dihydroxybutanoic acid         | 76.21  |
| 3,4,5-Trihydroxypentanoic acid     | 77.85  |
| 2-Oleoylglycerol                   | 80.69  |
| Glyceric acid                      | 81.65  |
| alpha-Tocopherol                   | 83.87  |
| L-(+)-Threose                      | 84.3   |
| D-Arabinose                        | 84.91  |
| 1,5-Anhydrohexitol                 | 85.65  |
| L-Tryptophan                       | 89.45  |
| Dodecanoic acid                    | 91.4   |
| Tryptophan                         | 92.05  |
| 3-Hydroxyisovaleric acid           | 94.33  |
| Glutamic acid                      | 100.48 |
| 3-Hydroxybutyric acid              | 114.25 |
| Pyruvic acid                       | 114.32 |
| Methionine                         | 116.18 |
| ?-Alanine                          | 117.19 |
| D-(-)-Tagatose                     | 120.25 |
| Aspartic acid                      | 124.85 |
| Azelaic acid                       | 127.08 |

|                                       |        |
|---------------------------------------|--------|
| <b>Bisphenol A</b>                    | 131.44 |
| <b>Levoglucofan</b>                   | 133.58 |
| <b>Ribonic acid</b>                   | 148.97 |
| <b>1,5-Anhydrohexitol</b>             | 171.48 |
| <b>Ethanolamine</b>                   | 194.86 |
| <b>Glycolic acid</b>                  | 225.34 |
| <b>2-Hydroxy-3-methylbutyric acid</b> | 245.9  |

Here, the median % CV (50th centile % CV) is 61.82 and the 90th centile % CV is 120.71.

**ESM Table 3.** Plasma metabolites different between CTR and PT1D at age 3 months.

| S:N | Metabolite               | Nominal p-values | Adjusted-pvalues | Log2F  |
|-----|--------------------------|------------------|------------------|--------|
| 1   | 11-Eicosenoic acid, (E)- | 0.0013           | 0.057            | -0.341 |
| 2   | L-5-Oxoproline           | 0.0013           | 0.057            | -0.143 |
| 3   | Stearic acid             | 0.0021           | 0.057            | -0.102 |
| 4   | Palmitic acid            | 0.0024           | 0.057            | -0.084 |
| 5   | Oleic acid               | 0.0032           | 0.0616           | -0.097 |
| 6   | Arachidonic acid         | 0.0043           | 0.067            | -0.132 |
| 7   | 1-Monopalmitin           | 0.0057           | 0.067            | -0.186 |
| 8   | Linoleic acid            | 0.0057           | 0.067            | -0.095 |
| 9   | Glutamic acid            | 0.0065           | 0.068            | -0.312 |
| 10  | 3-Hydroxybutyric acid    | 0.023            | 0.22             | -0.171 |
| 11  | Doconexent               | 0.033            | 0.26             | -0.19  |
| 12  | D-Arabinose              | 0.037            | 0.26             | -0.216 |
| 13  | Ribonic acid             | 0.041            | 0.26             | -0.755 |
| 14  | L-Threonic acid          | 0.041            | 0.26             | -0.162 |
| 15  | Glyceric acid            | 0.041            | 0.26             | -0.438 |

**ESM Table 4.** Plasma metabolites different between CTR and PT1D at age 6 months.

| S:N | Metabolite                 | Nominal P-values | Adjusted-pvalues | Log <sub>2</sub> F |
|-----|----------------------------|------------------|------------------|--------------------|
| 1   | Ribonic acid               | 7.4E-05          | 0.0070           | -0.919             |
| 2   | D-Arabinose                | 0.00063          | 0.020            | -0.23              |
| 3   | L-Threonic acid            | 0.00063          | 0.020            | -0.198             |
| 4   | Methionine                 | 0.0015           | 0.036            | 2.049              |
| 5   | Pentadecanoic acid         | 0.0019           | 0.036            | -0.177             |
| 6   | Glyceric acid              | 0.0025           | 0.036            | -0.402             |
| 7   | L-5-Oxoproline             | 0.0027           | 0.036            | -0.093             |
| 8   | Succinic acid              | 0.0040           | 0.045            | -0.187             |
| 9   | 1,5-Anhydrohexitol         | 0.00431          | 0.045            | -0.125             |
| 10  | Glutamic acid              | 0.0056           | 0.052            | -0.291             |
| 11  | L-Hydroxyproline, (E)-     | 0.0077           | 0.0655           | -0.221             |
| 12  | 4-Hydroxyphenyllactic acid | 0.0098           | 0.075            | -0.334             |
| 13  | Aspartic acid              | 0.010            | 0.075            | -0.732             |
| 14  | D-(-)-Lyxofuranose         | 0.014            | 0.093            | -0.482             |
| 15  | Tryptophan                 | 0.015            | 0.093            | -0.295             |
| 16  | 3-Indoleacetic acid        | 0.026            | 0.15             | -0.166             |
| 17  | alpha-Tocopherol           | 0.027            | 0.15             | 0.405              |
| 18  | Malic acid                 | 0.046            | 0.22             | -0.085             |
| 19  | 9-Tetradecenoic acid       | 0.048            | 0.21             | -0.223             |
| 20  | Creatinine                 | 0.048            | 0.26             | 0.153              |

**ESM Table 5.** The detailed results of potential metabolic pathways that altered between CTRL and PTiD at age 3 months

| Metabolic pathway                                   | Total Cpd | Hits | Nominal p | -log(p) | Holm adjust | FDR   | Impact |
|-----------------------------------------------------|-----------|------|-----------|---------|-------------|-------|--------|
| Alanine, aspartate and glutamate metabolism         | 24        | 2    | 0.0007    | 7.1429  | 0.0166      | 0.002 | 0.441  |
| Aminoacyl-tRNA biosynthesis                         | 75        | 2    | 0.0007    | 7.14    | 0.016       | 0.002 | 0.112  |
| D-Glutamine and D-glutamate metabolism              | 11        | 1    | 0.001     | 6.44    | 0.025       | 0.002 | 0.112  |
| Tryptophan metabolism                               | 79        | 1    | 0.052     | 2.93    | 0.106       | 0.055 | 0.047  |
| Arginine and proline metabolism                     | 77        | 2    | 0.0007    | 7.14    | 0.016       | 0.002 | 0.035  |
| Glyoxylate and dicarboxylate metabolism             | 50        | 1    | 0.017     | 4.02    | 0.106       | 0.020 | 0.032  |
| Pentose phosphate pathway                           | 32        | 1    | 0.017     | 4.02    | 0.106       | 0.020 | 0.021  |
| Glycerolipid metabolism                             | 32        | 1    | 0.017     | 4.02    | 0.106       | 0.020 | 0.020  |
| Glutathione metabolism                              | 38        | 1    | 0.001     | 6.44    | 0.025       | 0.002 | 0.010  |
| Butanoate metabolism                                | 40        | 2    | 0.0004    | 7.67    | 0.0101      | 0.002 | 0.004  |
| Ubiquinone and other terpenoid-quinone biosynthesis | 36        | 1    | 0.065     | 2.73    | 0.106       | 0.065 | 0.0006 |
| Nitrogen metabolism                                 | 39        | 2    | 0.0007    | 7.14    | 0.016       | 0.002 | 0.0006 |
| Histidine metabolism                                | 44        | 2    | 0.0007    | 7.14    | 0.016       | 0.002 | 0.0005 |
| Glycine, serine and threonine metabolism            | 48        | 2    | 0.003     | 5.72    | 0.025       | 0.004 | 0.0004 |
| Porphyrin and chlorophyll metabolism                | 104       | 1    | 0.0015    | 6.44    | 0.025       | 0.002 | 0      |
| Cysteine and methionine metabolism                  | 56        | 1    | 0.001     | 6.39    | 0.025       | 0.002 | 0      |
| Lysine biosynthesis                                 | 32        | 1    | 0.001     | 6.39    | 0.025       | 0.002 | 0      |
| beta-Alanine metabolism                             | 28        | 1    | 0.001     | 6.39    | 0.025       | 0.002 | 0      |
| Cyanoamino acid metabolism                          | 16        | 1    | 0.001     | 6.39    | 0.025       | 0.002 | 0      |
| Nicotinate and nicotinamide metabolism              | 44        | 1    | 0.001     | 6.39    | 0.025       | 0.002 | 0      |
| Pantothenate and CoA biosynthesis                   | 27        | 1    | 0.001     | 6.39    | 0.025       | 0.002 | 0      |
| Synthesis and degradation of ketone bodies          | 6         | 1    | 0.030     | 3.48    | 0.106       | 0.033 | 0      |

**ESM Table 6.** The detailed results of potential metabolic pathways that altered between CTRL and PT1D at age 6 months

| Metabolic pathway                                   | Total Cpd | Hits | Nominal p | -log(p) | Holm adjust | FDR      | Impact   |
|-----------------------------------------------------|-----------|------|-----------|---------|-------------|----------|----------|
| Alanine, aspartate and glutamate metabolism         | 24        | 3    | 0.00086   | 7.06    | 0.019       | 0.002568 | 0.4416   |
| Tryptophan metabolism                               | 79        | 2    | 0.0084    | 4.78    | 0.046       | 0.008711 | 0.15633  |
| Arginine and proline metabolism                     | 77        | 4    | 0.00016   | 8.74    | 0.004       | 0.001581 | 0.11325  |
| Aminoacyl-tRNA biosynthesis                         | 75        | 4    | 9.72E-05  | 9.24    | 0.002       | 0.001581 | 0.11268  |
| D-Glutamine and D-glutamate metabolism              | 11        | 1    | 0.0011    | 6.85    | 0.021       | 0.002568 | 0.1123   |
| Cysteine and methionine metabolism                  | 56        | 2    | 0.00024   | 8.33    | 0.006256    | 0.001581 | 0.03806  |
| Ubiquinone and other terpenoid-quinone biosynthesis | 36        | 2    | 0.0044    | 5.43    | 0.035311    | 0.005776 | 0.03749  |
| Glyoxylate and dicarboxylate metabolism             | 50        | 2    | 0.0018    | 6.30    | 0.031202    | 0.00321  | 0.03291  |
| Pentose phosphate pathway                           | 32        | 1    | 0.0022    | 6.12    | 0.035311    | 0.00321  | 0.02181  |
| Glycerolipid metabolism                             | 32        | 1    | 0.0022    | 6.12    | 0.035311    | 0.00321  | 0.0206   |
| Butanoate metabolism                                | 40        | 2    | 0.0010    | 6.87    | 0.021825    | 0.002568 | 0.01774  |
| Citrate cycle (TCA cycle)                           | 20        | 1    | 0.0071    | 4.95    | 0.045828    | 0.007628 | 0.01446  |
| Glutathione metabolism                              | 38        | 2    | 0.000382  | 7.87    | 0.009171    | 0.00159  | 0.01285  |
| Ascorbate and aldarate metabolism                   | 45        | 2    | 0.00018   | 8.61    | 0.004902    | 0.001581 | 0.00802  |
| Propanoate metabolism                               | 35        | 1    | 0.0071    | 4.95    | 0.045828    | 0.007628 | 0.00134  |
| Nitrogen metabolism                                 | 39        | 3    | 0.00027   | 8.21    | 0.006815    | 0.001581 | 0.00067  |
| Histidine metabolism                                | 44        | 2    | 0.0010    | 6.86    | 0.021825    | 0.002568 | 0.00051  |
| Glycine, serine and threonine metabolism            | 48        | 3    | 0.00038   | 7.87    | 0.009171    | 0.00159  | 0.00047  |
| Amino sugar and nucleotide sugar metabolism         | 88        | 1    | 0.0065    | 5.03    | 0.045828    | 0.007628 | 7.00E-05 |
| Porphyrin and chlorophyll metabolism                | 104       | 1    | 0.0011    | 6.85    | 0.021825    | 0.002568 | 0        |
| Lysine biosynthesis                                 | 32        | 1    | 0.0022    | 6.11    | 0.035311    | 0.00321  | 0        |
| beta-Alanine metabolism                             | 28        | 1    | 0.0022    | 6.11    | 0.035311    | 0.00321  | 0        |
| Cyanoamino acid metabolism                          | 16        | 1    | 0.0022    | 6.11    | 0.035311    | 0.00321  | 0        |
| Nicotinate and nicotinamide metabolism              | 44        | 1    | 0.0022    | 6.11    | 0.035311    | 0.00321  | 0        |
| Pantothenate and CoA biosynthesis                   | 27        | 1    | 0.0022    | 6.11    | 0.035311    | 0.00321  | 0        |
| Tyrosine metabolism                                 | 76        | 2    | 0.0028    | 5.87    | 0.035311    | 0.003895 | 0        |
| Pentose and glucuronate interconversions            | 53        | 1    | 0.0065    | 5.03    | 0.045828    | 0.007628 | 0        |
| Phenylalanine metabolism                            | 45        | 1    | 0.0071    | 4.95    | 0.045828    | 0.007628 | 0        |
| Phenylalanine, tyrosine and tryptophan biosynthesis | 27        | 1    | 0.011     | 4.47    | 0.045828    | 0.011493 | 0        |

**ESM Table 7.** Plasma metabolites different between B-P<sub>1</sub>Ab and A-P<sub>1</sub>Ab.

| <b>S:N</b> | <b>Metabolite</b>                  | <b>Nominal<br/>p-values</b> | <b>Adjusted-p-values</b> |
|------------|------------------------------------|-----------------------------|--------------------------|
| 1          | Glutamic acid                      | 0.00017                     | 0.016                    |
| 2          | Aspartic acid                      | 0.0015                      | 0.047                    |
| 3          | Malic acid                         | 0.0015                      | 0.047                    |
| 4          | 3,4-Dihydroxybutanoic acid         | 0.0022                      | 0.052                    |
| 5          | Glyceric acid                      | 0.010                       | 0.19                     |
| 6          | 3-Hydroxybutyric acid              | 0.016                       | 0.26                     |
| 7          | (R*,R*)-2,3-Dihydroxybutanoic acid | 0.024                       | 0.29                     |
| 8          | Ribonic acid                       | 0.025                       | 0.29                     |
| 9          | D-Arabinose                        | 0.040                       | 0.38                     |
| 10         | 3-Indoleacetic acid                | 0.048                       | 0.38                     |
| 11         | alpha-Tocopherol                   | 0.049                       | 0.38                     |

Abbreviations: Before seroconversion in P<sub>1</sub>Ab (B-P<sub>1</sub>Ab), after seroconversion in P<sub>1</sub>Ab (A-P<sub>1</sub>Ab).

**ESM Table 8.** Plasma metabolites different between B-PT<sub>1</sub>D and A-PT<sub>1</sub>D.

| <b>S:N</b> | <b>Metabolite</b>              | <b>Nominal-p-values</b> | <b>Adjusted p-values</b> |
|------------|--------------------------------|-------------------------|--------------------------|
| 1          | Malic acid                     | 0.0017                  | 0.16                     |
| 2          | Tyrosine                       | 0.0037                  | 0.17                     |
| 3          | Glycolic acid                  | 0.0074                  | 0.19                     |
| 4          | L-Threonine                    | 0.0080                  | 0.19                     |
| 5          | 3,4,5-Trihydroxypentanoic acid | 0.023                   | 0.40                     |
| 6          | Glutamic acid                  | 0.026                   | 0.40                     |
| 7          | 2-Phenylisopropanol            | 0.044                   | 0.60                     |

Abbreviations: Before seroconversion in progressors (B-PT<sub>1</sub>D), after seroconversion in progressors (A-PT<sub>1</sub>D).



**ESM Table 9.** The detailed results of potential metabolic pathways that altered between B-P<sub>1</sub>Ab and A-P<sub>1</sub>Ab.

| Metabolic pathway                                   | Total Cpd | Hits | Nominal p | -log(p) | Holm adjust | FDR      | Impact  |
|-----------------------------------------------------|-----------|------|-----------|---------|-------------|----------|---------|
| Alanine, aspartate and glutamate metabolism         | 24        | 2    | 0.00079   | 7.1429  | 0.0166      | 0.002455 | 0.4416  |
| Aminoacyl-tRNA biosynthesis                         | 75        | 2    | 0.00079   | 7.1429  | 0.0166      | 0.002455 | 0.11268 |
| D-Glutamine and D-glutamate metabolism              | 11        | 1    | 0.001595  | 6.4409  | 0.025519    | 0.002455 | 0.1123  |
| Tryptophan metabolism                               | 79        | 1    | 0.052983  | 2.9378  | 0.10694     | 0.055506 | 0.0478  |
| Arginine and proline metabolism                     | 77        | 2    | 0.00079   | 7.1429  | 0.0166      | 0.002455 | 0.03582 |
| Glyoxylate and dicarboxylate metabolism             | 50        | 1    | 0.017823  | 4.0273  | 0.10694     | 0.020637 | 0.03291 |
| Pentose phosphate pathway                           | 32        | 1    | 0.017823  | 4.0273  | 0.10694     | 0.020637 | 0.02181 |
| Glycerolipid metabolism                             | 32        | 1    | 0.017823  | 4.0273  | 0.10694     | 0.020637 | 0.0206  |
| Glutathione metabolism                              | 38        | 1    | 0.001595  | 6.4409  | 0.025519    | 0.002455 | 0.01095 |
| Butanoate metabolism                                | 40        | 2    | 0.000462  | 7.6796  | 0.010168    | 0.002455 | 0.0048  |
| Ubiquinone and other terpenoid-quinone biosynthesis | 36        | 1    | 0.065137  | 2.7313  | 0.10694     | 0.065137 | 0.00069 |
| Nitrogen metabolism                                 | 39        | 2    | 0.00079   | 7.1429  | 0.0166      | 0.002455 | 0.00067 |
| Histidine metabolism                                | 44        | 2    | 0.00079   | 7.1429  | 0.0166      | 0.002455 | 0.00051 |
| Glycine, serine and threonine metabolism            | 48        | 2    | 0.003253  | 5.7281  | 0.025519    | 0.004473 | 0.00047 |
| Porphyrin and chlorophyll metabolism                | 104       | 1    | 0.001595  | 6.4409  | 0.025519    | 0.002455 | 0       |
| Cysteine and methionine metabolism                  | 56        | 1    | 0.001674  | 6.3928  | 0.025519    | 0.002455 | 0       |
| Lysine biosynthesis                                 | 32        | 1    | 0.001674  | 6.3928  | 0.025519    | 0.002455 | 0       |
| beta-Alanine metabolism                             | 28        | 1    | 0.001674  | 6.3928  | 0.025519    | 0.002455 | 0       |
| Cyanoamino acid metabolism                          | 16        | 1    | 0.001674  | 6.3928  | 0.025519    | 0.002455 | 0       |
| Nicotinate and nicotinamide metabolism              | 44        | 1    | 0.001674  | 6.3928  | 0.025519    | 0.002455 | 0       |
| Pantothenate and CoA biosynthesis                   | 27        | 1    | 0.001674  | 6.3928  | 0.025519    | 0.002455 | 0       |
| Synthesis and degradation of ketone bodies          | 6         | 1    | 0.030629  | 3.4858  | 0.10694     | 0.033692 | 0       |

**ESM Table 10.** The detailed results of potential metabolic pathways that altered between B-PT1D and A-PT1D.

| Metabolic pathway                                   | Total Cpd | Hits | Nominal p | -log(p) | Holm adjust | FDR      | Impact  |
|-----------------------------------------------------|-----------|------|-----------|---------|-------------|----------|---------|
| Alanine, aspartate and glutamate metabolism         | 24        | 1    | 0.077339  | 2.5596  | 0.46403     | 0.077339 | 0.17664 |
| D-Glutamine and D-glutamate metabolism              | 11        | 1    | 0.077339  | 2.5596  | 0.46403     | 0.077339 | 0.1123  |
| Glycine, serine and threonine metabolism            | 48        | 1    | 0.037713  | 3.2778  | 0.3017      | 0.058283 | 0.09661 |
| Aminoacyl-tRNA biosynthesis                         | 75        | 3    | 0.00216   | 6.1376  | 0.026103    | 0.005246 | 0.05634 |
| Tyrosine metabolism                                 | 76        | 1    | 0.001631  | 6.4183  | 0.026103    | 0.004622 | 0.04724 |
| Arginine and proline metabolism                     | 77        | 1    | 0.077339  | 2.5596  | 0.46403     | 0.077339 | 0.03582 |
| Glutathione metabolism                              | 38        | 1    | 0.077339  | 2.5596  | 0.46403     | 0.077339 | 0.01095 |
| Phenylalanine, tyrosine and tryptophan biosynthesis | 27        | 1    | 0.001631  | 6.4183  | 0.026103    | 0.004622 | 0.00738 |
| Glyoxylate and dicarboxylate metabolism             | 50        | 1    | 0.011235  | 4.4887  | 0.11235     | 0.023874 | 0.00686 |
| Histidine metabolism                                | 44        | 1    | 0.077339  | 2.5596  | 0.46403     | 0.077339 | 0.00051 |
| Nitrogen metabolism                                 | 39        | 2    | 0.001151  | 6.7676  | 0.019558    | 0.004622 | 0       |
| Ubiquinone and other terpenoid-quinone biosynthesis | 36        | 1    | 0.001631  | 6.4183  | 0.026103    | 0.004622 | 0       |
| Phenylalanine metabolism                            | 45        | 1    | 0.001631  | 6.4183  | 0.026103    | 0.004622 | 0       |
| Thiamine metabolism                                 | 24        | 1    | 0.001631  | 6.4183  | 0.026103    | 0.004622 | 0       |
| Porphyrin and chlorophyll metabolism                | 104       | 2    | 0.026077  | 3.6467  | 0.23469     | 0.049257 | 0       |
| Valine, leucine and isoleucine biosynthesis         | 27        | 1    | 0.037713  | 3.2778  | 0.3017      | 0.058283 | 0       |
| Butanoate metabolism                                | 40        | 1    | 0.077339  | 2.5596  | 0.46403     | 0.077339 | 0       |
